# Supplementary material
Source: publisher figshare collection journal article supplement (https://karger.figshare.com/ndownloader/files/27962880)
Supplement: Supplementary file 1 [file 27962880]

**APPENDIX**

Data and code used for data analysis can be found in the Supplement.

TABLE S1: A list of all chimpanzees housed at the Los Angeles Zoo during data collection (from June of 2017 to 2018). †This individual died during the study, and her data were removed from the analysis.

| **Name** | **Birth Date** | **Birthplace** | **Age Group** |
| --- | --- | --- | --- |
| Pandora (deceased) † | 03/05/1967 | Los Angeles Zoo | Adult |
| Nan | 12/12/1979 | Los Angeles Zoo | Adult |
| Regina | 10/23/1983 | Los Angeles Zoo | Adult |
| Julie | 03/28/1986 | Other Zoo | Adult |
| Gracie | 01/26/1987 | Los Angeles Zoo | Adult |
| Shaun | 07/08/1988 | Los Angeles Zoo | Adult |
| Jerrard | 02/20/1990 | Los Angeles Zoo | Adult |
| Yoshiko | 07/02/1990 | Los Angeles Zoo | Adult |
| Glenn | 04/21/1994 | Los Angeles Zoo | Adult |
| Jean | 05/06/1999 | Los Angeles Zoo | Adult |
| Ben | 07/31/2002 | Other Zoo | Adult |
| Jake | 06/14/1999 | Los Angeles Zoo | Adult |
| Zoe | 08/09/1999 | Research Lab | Adult |
